# Supplementary material for: Acid-Modulated Peptide Synthesis for Application on Oxide Biosensor Interfaces
Source: MDPI journal article supplement (doi:10.3390/nano13243092), 2023-12-06
Supplement: s1 [file s1]

## Supplementary information

### Acid-modulated peptide synthesis for application on oxide biosensor interfaces

**Edgar Cristóbal-Lecina<sup>1,\*</sup>, Janwa El-Maiss<sup>2</sup>, Eduard Figueras<sup>1</sup>, Aruna Chandra Singh<sup>2</sup>, Sivashankar Krishnamoorthy<sup>2</sup>, Thomas Østerbye<sup>3</sup>, César Pascual García<sup>2,\*</sup> and David Andreu<sup>1,\*</sup>**

<sup>1</sup> Proteomics and Protein chemistry Unit, Department of Medicine and Life Sciences, Pompeu Fabra University, 08003 Barcelona, Spain; [edgar.cristobal@upf.edu](mailto:edgar.cristobal@upf.edu); [david.andreu@upf.edu](mailto:david.andreu@upf.edu)

<sup>2</sup> Luxembourg insitute of science and technology, MRT department, L-4420 Belvaux, Luxembourg

<sup>3</sup> Department of Immunology and Microbiology, University of Copenhagen, Denmark, [thos@sund.ku.dk](mailto:thos@sund.ku.dk)

\* Correspondence: [cesar.pascual@list.lu](mailto:cesar.pascual@list.lu); [david.andreu@upf.edu](mailto:david.andreu@upf.edu), [edgar.cristobal@upf.edu](mailto:edgar.cristobal@upf.edu).

## Contents

|                                                                                             | <b>Page</b> |
|---------------------------------------------------------------------------------------------|-------------|
| • Figure S1: Structure, HPLC and MS data of APTAPLPG (Fmoc synthesis)                       | S3          |
| • Table S1: Sequences, synthetic and analytical data of FPXAG peptide series                | S4-S11      |
| • Table S2: Sequences, synthetic and analytical data of longer and DYK-based peptide series | S12-S16     |
| • Figure S2: LC-MS of standard and fast FPIAG syntheses on-glass surface                    | S17         |
| • Table S3: Parameters used for the De Feijter equation                                     | S18         |

Figure S1

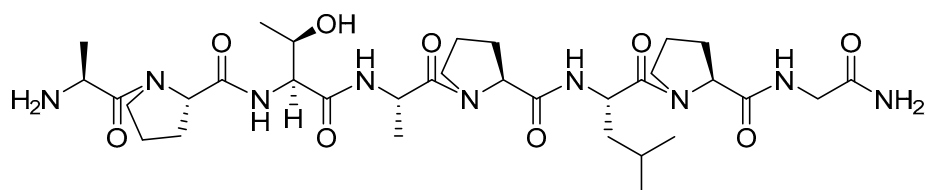

Chemical Formula:  $C_{33}H_{55}N_9O_9$   
Exact Mass: 721,41

mV

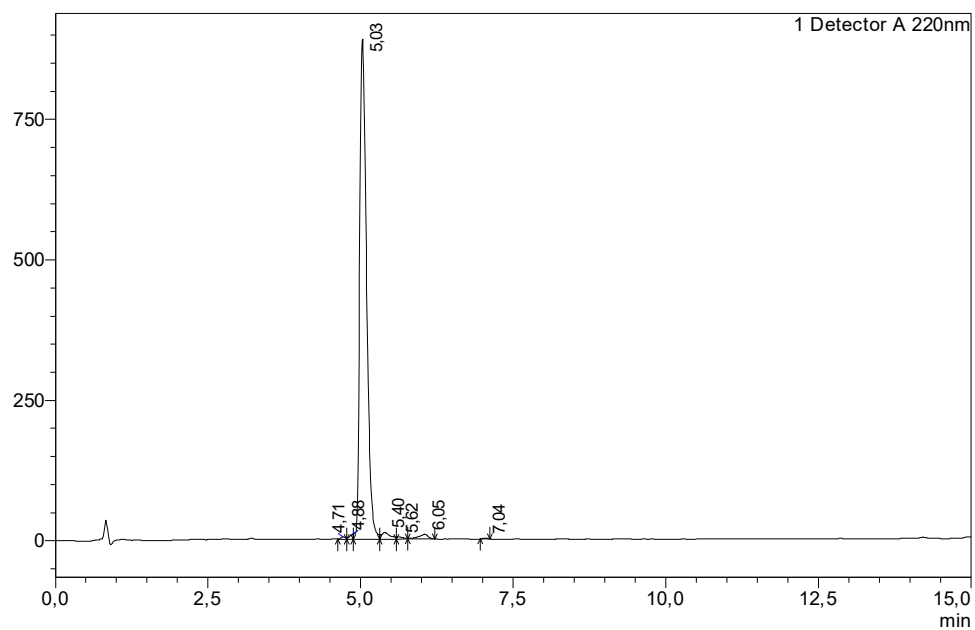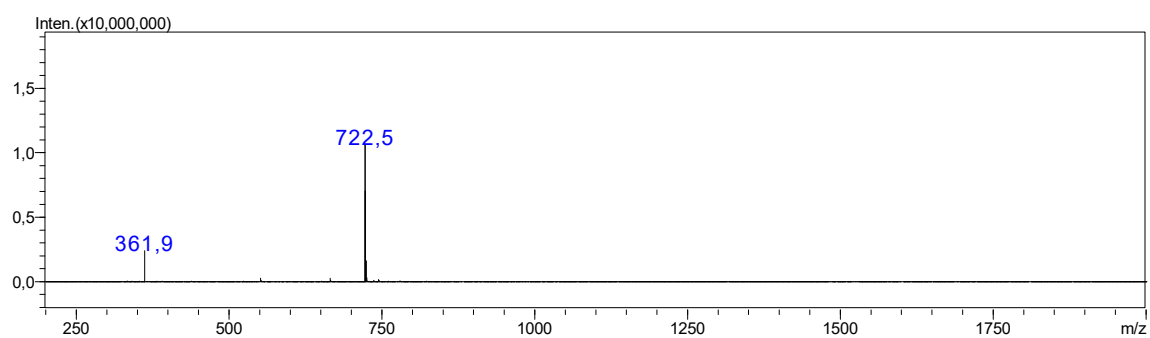

**Table S1**

| Entry | Peptides <sup>1</sup> | Protecting group | Theoretical Mass (Da) | Experimental Mas (Da) <sup>2</sup> | HPLC retention time (min) | Gradient <sup>3</sup> | Purity <sup>4</sup> |
|-------|-----------------------|------------------|-----------------------|------------------------------------|---------------------------|-----------------------|---------------------|
| 1     | FPLAG                 | None             | 503.26                | 504.19                             | 6.8                       | 5-40% <sup>a</sup>    | 98%                 |
| 2     | FPIAG                 | None             | 503.26                | 504.30                             | 6.5                       | 5-40% <sup>a</sup>    | 95%                 |
| 3     | FPVAG                 | None             | 489.25                | 490.20                             | 6.0                       | 5-40% <sup>a</sup>    | 94%                 |
| 4     | FPDAG                 | OFm              | 505.21                | 506.12                             | 4.2                       | 5-40% <sup>a</sup>    | 96%                 |
| 5     | FPEAG                 | OFm              | 519.22                | 520.25                             | 4.2                       | 5-40% <sup>a</sup>    | 95%                 |
| 6     | FPEAG <sup>5</sup>    | OFm              | 519.22                | 520.25                             | 4.2                       | 5-40% <sup>a</sup>    | 95%                 |
| 7     | FPKAG                 | Fmoc             | 518.27                | 519.30                             | 5.0                       | 5-40% <sup>a</sup>    | 86%                 |
| 8     | FPNAG                 | None             | 504.22                | 505.25                             | 4.5                       | 5-40% <sup>a</sup>    | 80%                 |
| 9     | FPQAG                 | None             | 518.24                | 519.25                             | 4.5                       | 5-40% <sup>a</sup>    | 96%                 |
| 10    | FPWAG                 | None             | 576.26                | 577.30                             | 8.9                       | 5-40% <sup>a</sup>    | 96%                 |
| 11    | FPHAG                 | None             | 527.24                | n.d.                               | -                         | -                     | -                   |
| 12    | FPHAG                 | Dnp              | 527.24                | 528.10                             | 0.4                       | 5-95% <sup>b</sup>    | 74%                 |
| 13    | FPHAG                 | Trt              | 527.24                | 528.31                             | 3.0                       | 5-40% <sup>a</sup>    | 91%                 |
| 14    | FPMAG                 | None             | 521.22                | 522.20                             | 4.2                       | 5-40% <sup>a</sup>    | 76%                 |
| 15    | FPCAG                 | None             | 493.19                | n.d.                               | -                         | -                     | -                   |
| 16    | FPCAG                 | Fm               | 493.19                | 493.55                             | 1.2                       | 5-95% <sup>b</sup>    | 58%                 |
| 17    | FPCAG                 | Fm/DODT          | 493.19                | 493.35                             | 1.2                       | 5-95% <sup>b</sup>    | 75%                 |
| 18    | FPSAG                 | None             | 477.21                | 478.20                             | 4.0                       | 5-40% <sup>a</sup>    | 77%                 |
| 19    | FPSAG                 | tBu              | 477.21                | 478.33                             | 4.0                       | 5-40% <sup>a</sup>    | 82%                 |
| 20    | FPTAG                 | None             | 491.23                | 492.25                             | 4.0                       | 5-40% <sup>a</sup>    | 81%                 |
| 21    | FPTAG <sup>6</sup>    | tBu              | 491.23                | 492.39                             | 4.0                       | 5-40% <sup>a</sup>    | 81%                 |
| 22    | FPYAG                 | None             | 553.24                | 554.30                             | 6.0                       | 5-40% <sup>a</sup>    | 56%                 |
| 23    | FPYAG                 | 2-Br-Z           | 553.24                | 554.34                             | 6.0                       | 5-40% <sup>a</sup>    | 95%                 |

<sup>1</sup> All peptides are C-terminal carboxylic acid; <sup>2</sup> Determined by LC-MS; <sup>3</sup> Linear MeCN (+0.036% TFA) into H<sub>2</sub>O (+0.045% TFA) over 15 min (a) or 5 min (b); <sup>4</sup> Determined by analytical HPLC. n.d : not determined.

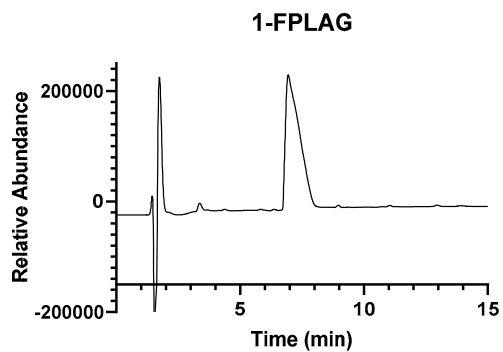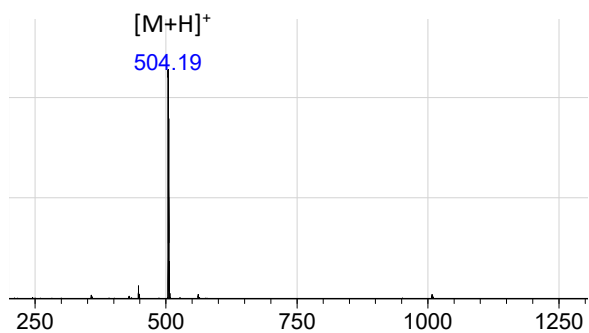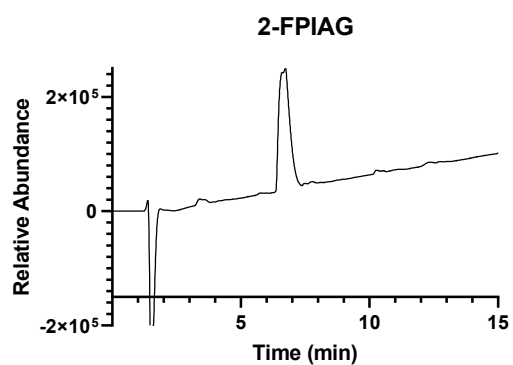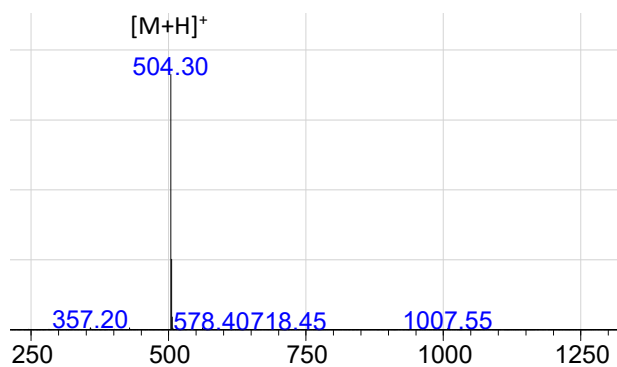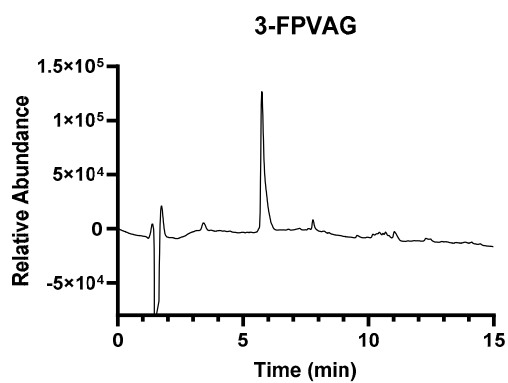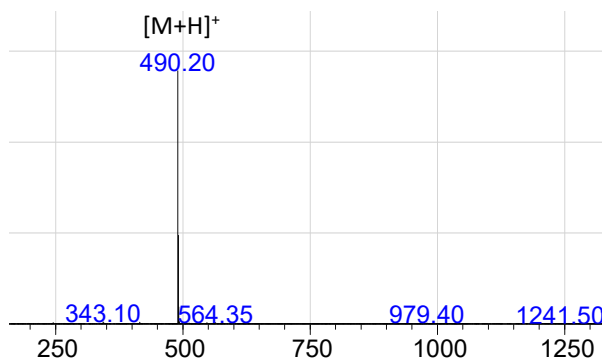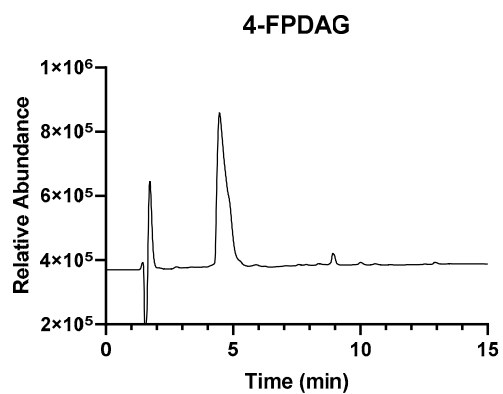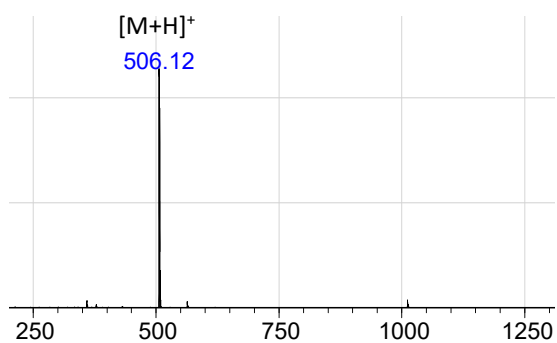

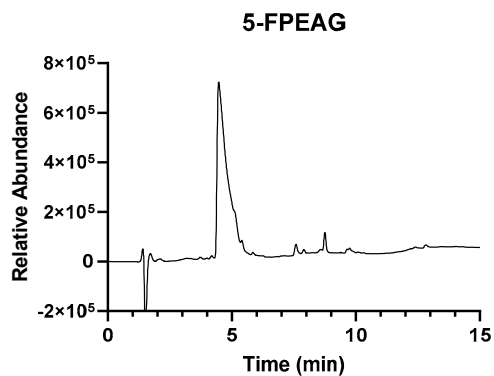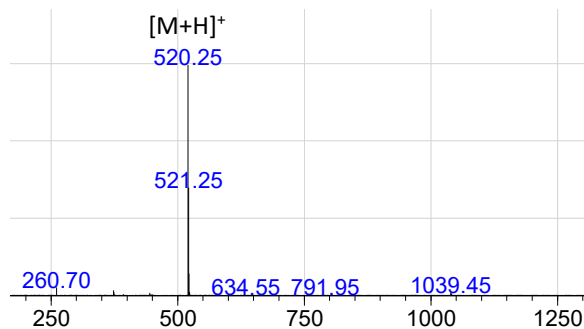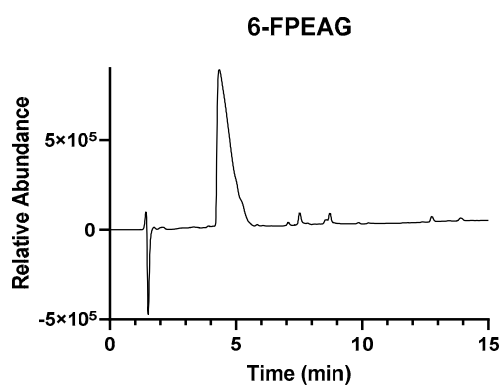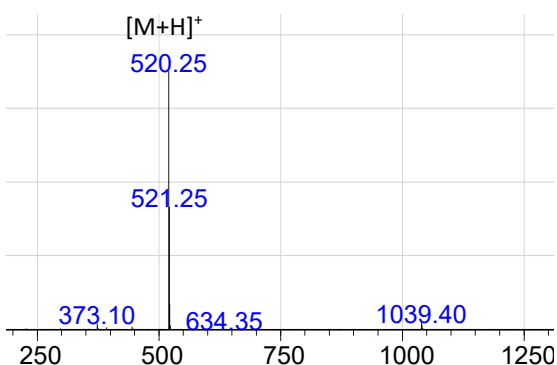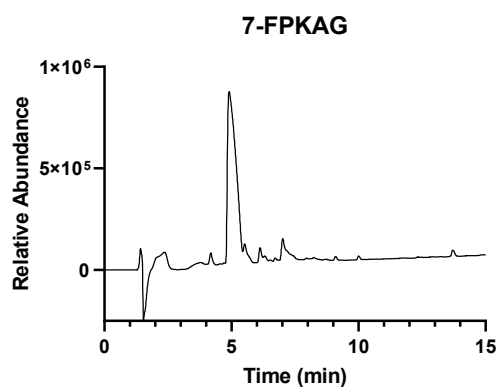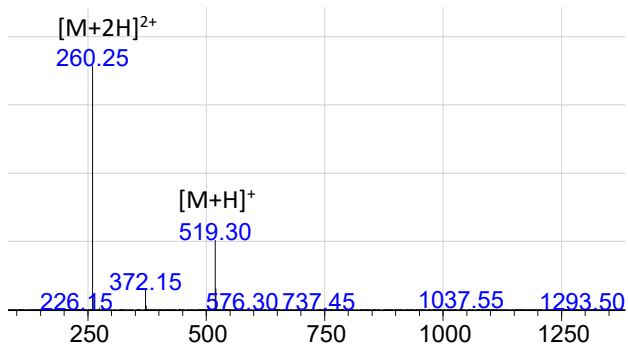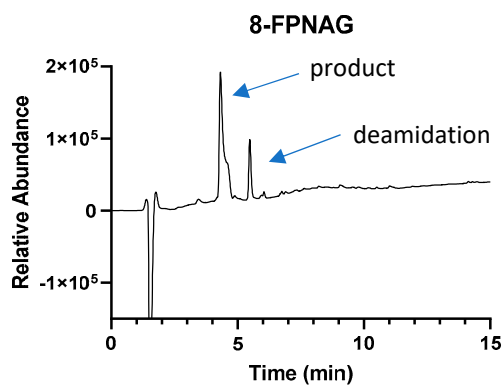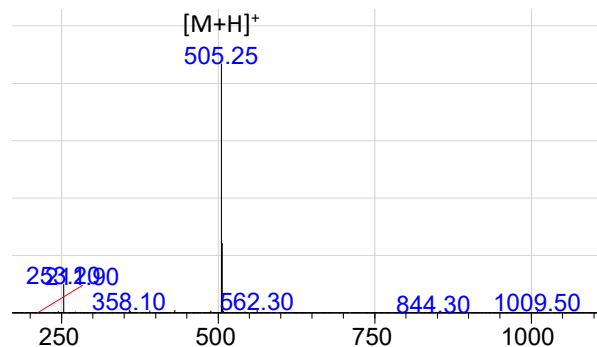

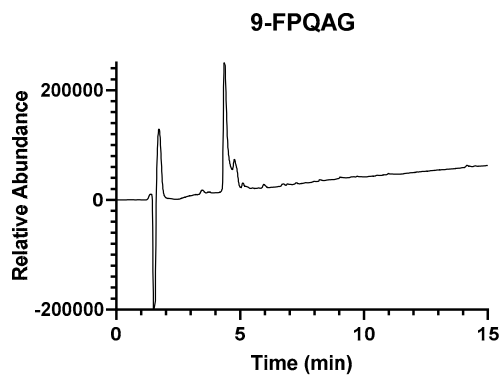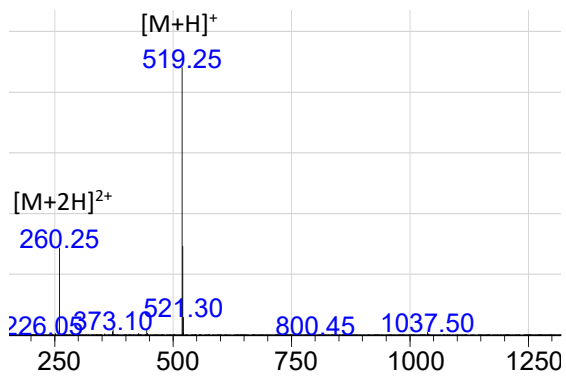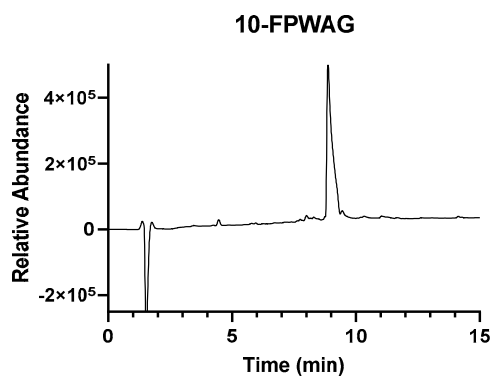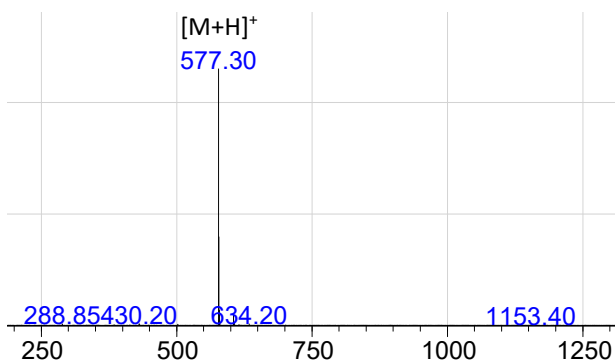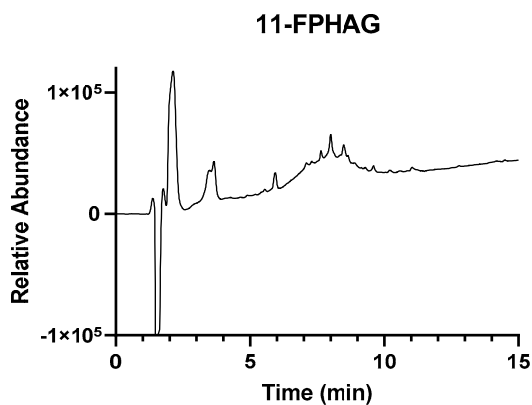

No mass compatible with 11 found

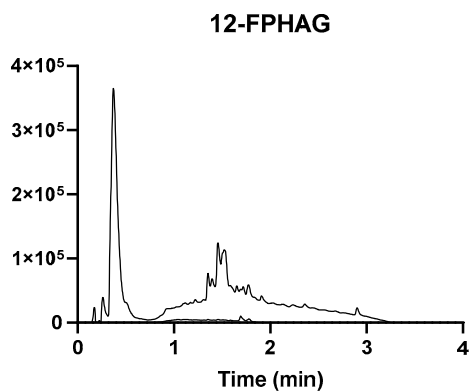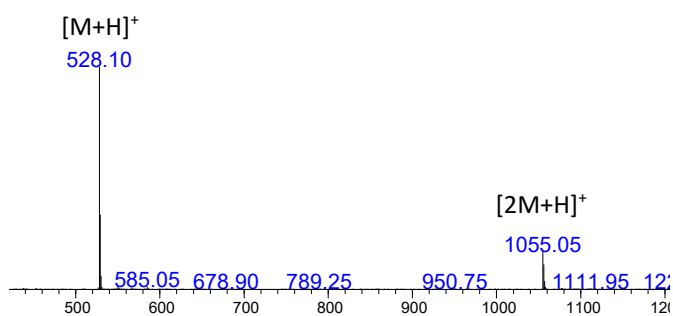

### 13-FPHAG

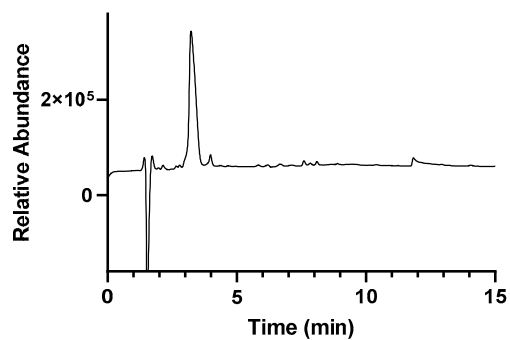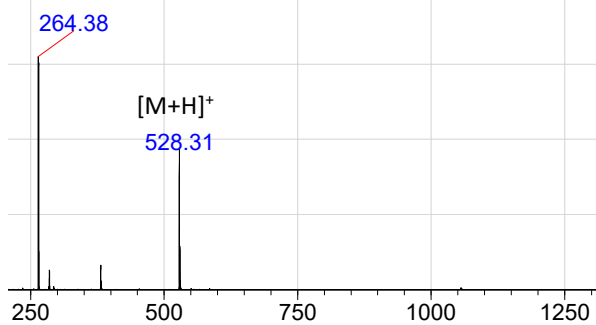

### 14-FPMAG

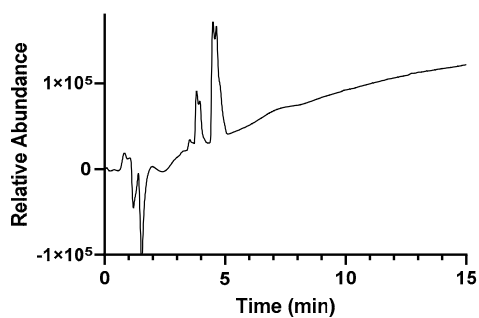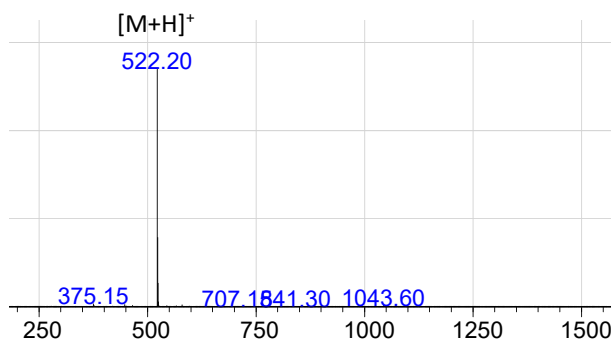

### 16-FPCAG

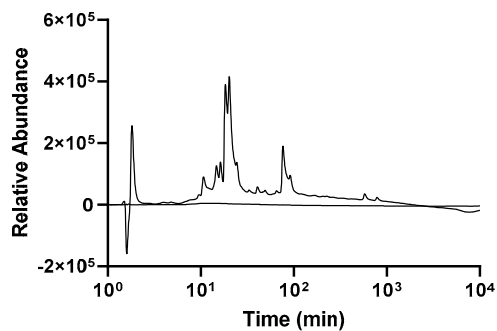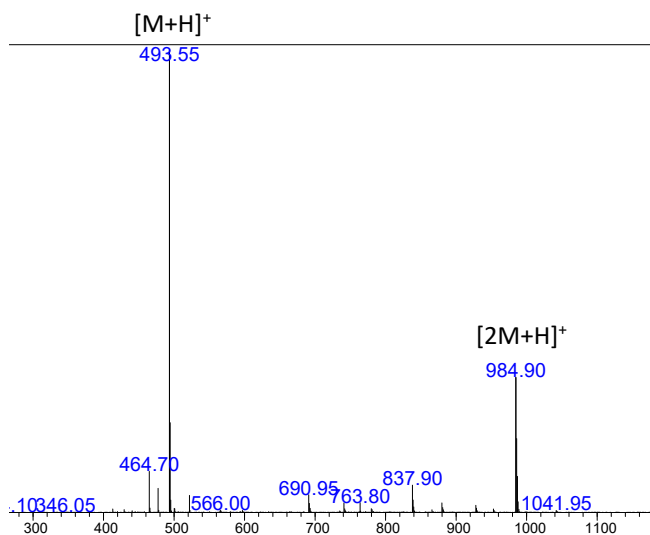



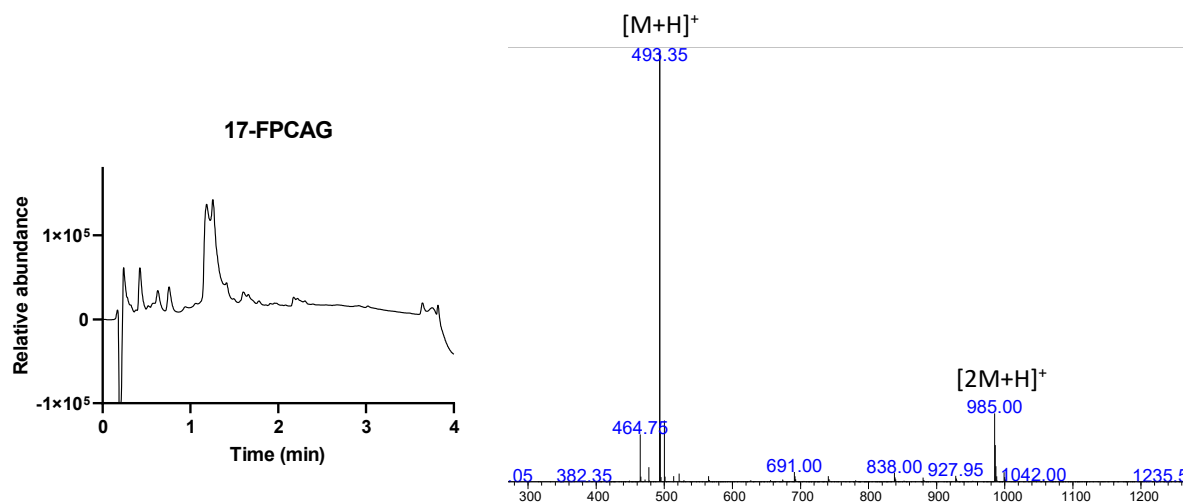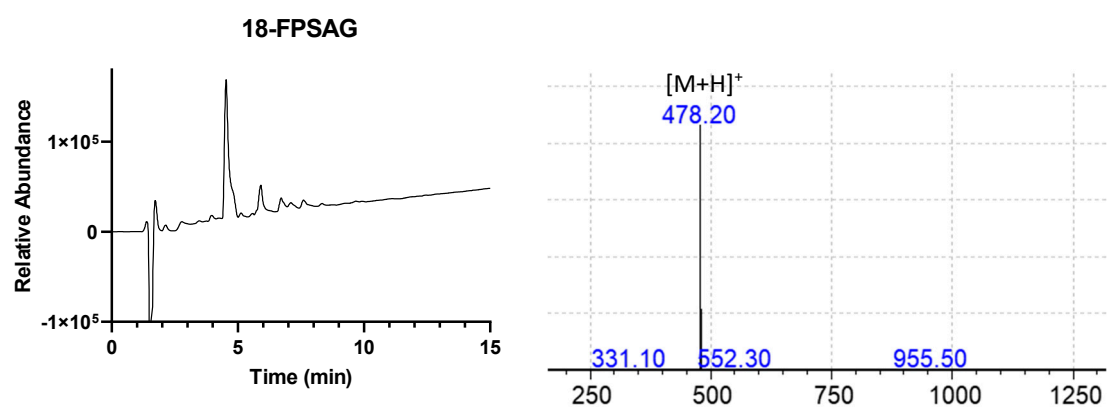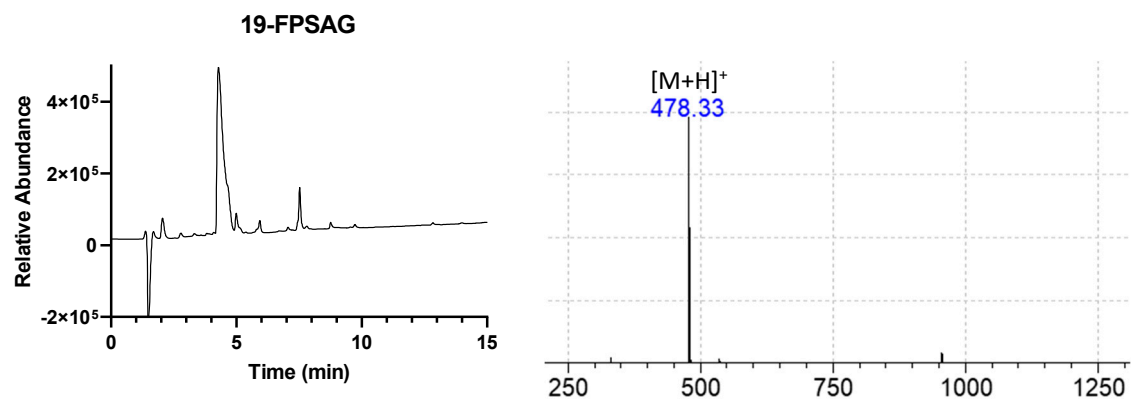

20-FPTAG

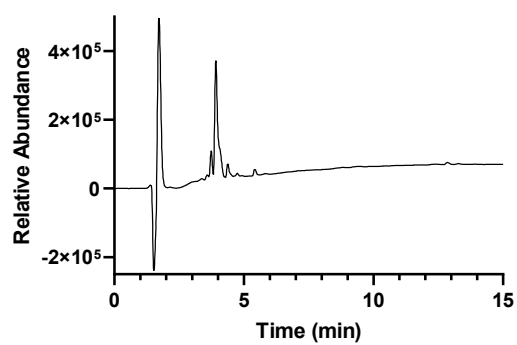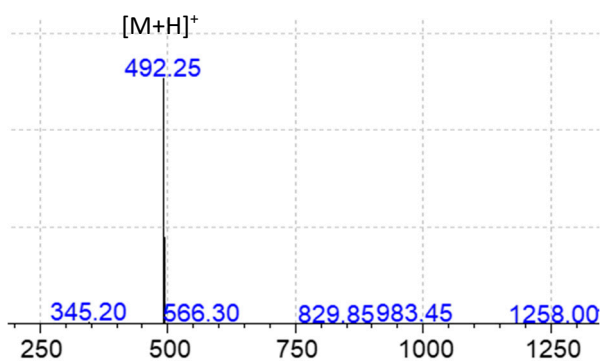

21-FPTAG

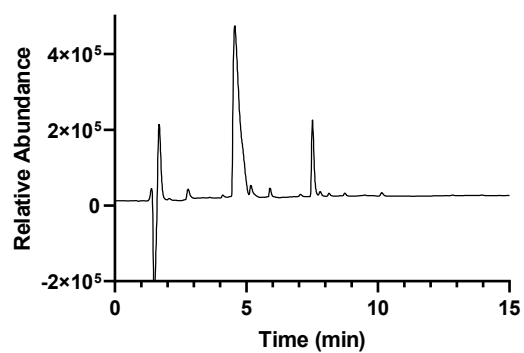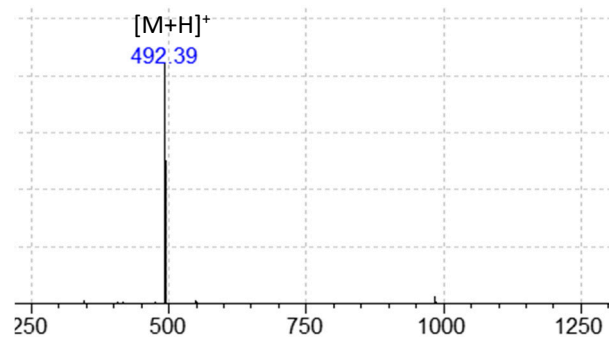

22-FPYAG

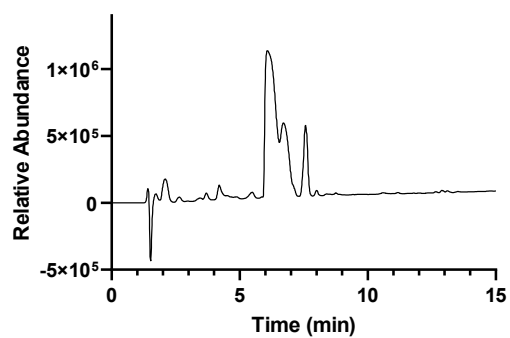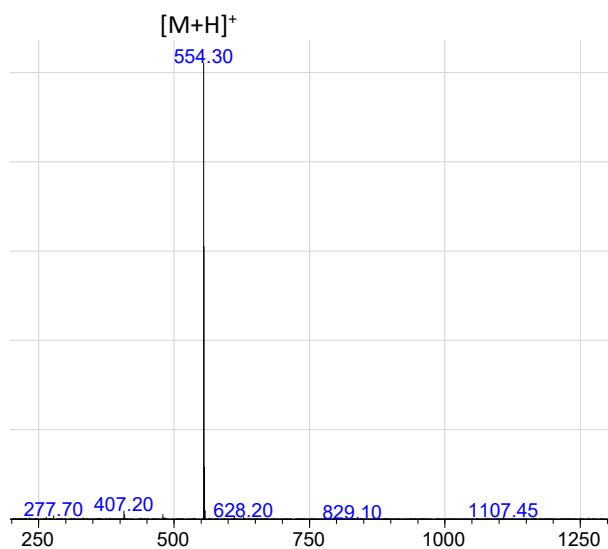

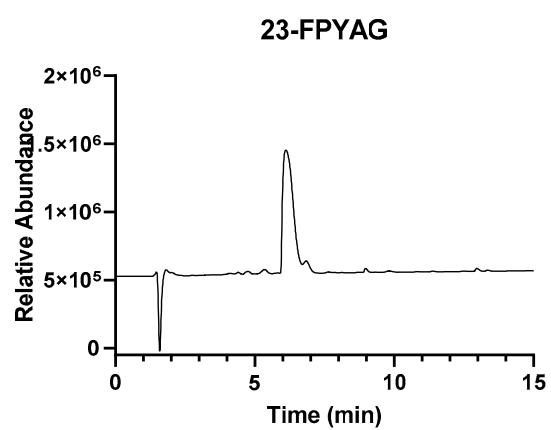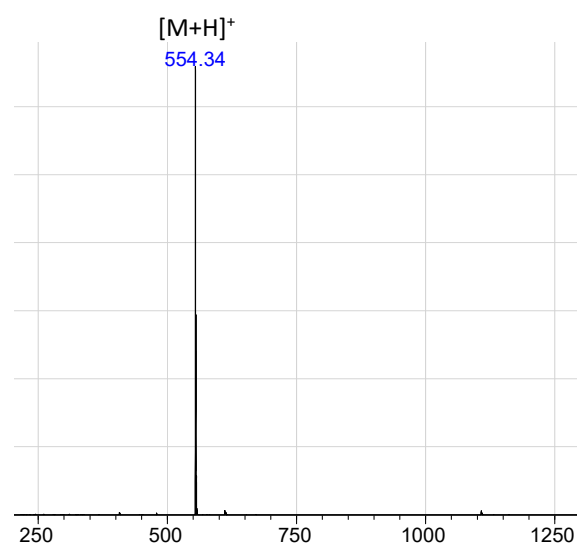

Table S2

| Entry | Peptides <sup>1</sup> | Theoretical Mass (Da) | Experimental Mas (Da) <sup>2</sup> | HPLC retention time (min) <sup>3</sup> | Gradient | Purity <sup>4</sup> |
|-------|-----------------------|-----------------------|------------------------------------|----------------------------------------|----------|---------------------|
| 1     | FGAFPIAG              | 778.39                | 779.40                             | 6.0                                    | 5-40%    | 94%                 |
| 2     | FGAFPVAG              | 764.38                | 765.30                             | 9.1                                    | 5-40%    | 91%                 |
| 3     | FGAFPEAG              | 794.35                | 795.41                             | 7.9                                    | 5-40%    | 97%                 |
| 4     | GAFGAFPVAG            | 892.43                | 893.35                             | 10                                     | 5-40%    | 90%                 |
| 5     | EAFGAFPEAG            | 994.43                | 995.31                             | 8.5                                    | 5-40%    | 89%                 |
| 6     | GDEAFGAFPEAG          | 1166.48               | 1167.47                            | 9                                      | 5-40%    | 80%                 |
| 7     | FGAFGAFGAFPIAG        | 1328.64               | 1330.60                            | 13.5                                   | 5-40%    | 76%                 |
| 8     | DYKG                  | 481.21                | 482.25                             | 1.6                                    | 5-40%    | 60%                 |
| 9     | DYKG <sup>5</sup>     | 481.21                | 482.26                             | 1.6                                    | 5-40%    | 77%                 |
| 10    | DYKGG                 | 538.23                | 539.25                             | 2.8                                    | 0-30%    | 62%                 |
| 11    | DYKGG <sup>5</sup>    | 538.23                | 539.36                             | 1.6                                    | 5-40%    | 72%                 |
| 12    | DYKD                  | 539.21                | 540.25                             | 3.8                                    | 0-40%    | 63%                 |
| 13    | DYKDD                 | 654.24                | 655.20                             | 4.9                                    | 0-20%    | 63%                 |
| 14    | DYKK                  | 552.28                | 553.20                             | 2.1                                    | 0-40%    | 57%                 |

<sup>1</sup> All peptides are C-terminal carboxylic acid; <sup>2</sup> Determined by LC-MS; <sup>3</sup> Linear MeCN (+0.036% TFA) into H<sub>2</sub>O (+0.045% TFA) over 15 min; <sup>4</sup> Determined by analytical HPLC; <sup>5</sup> Asp (D) protected as OFm ester; Tyr (Y) protected with 2-Br-Z.

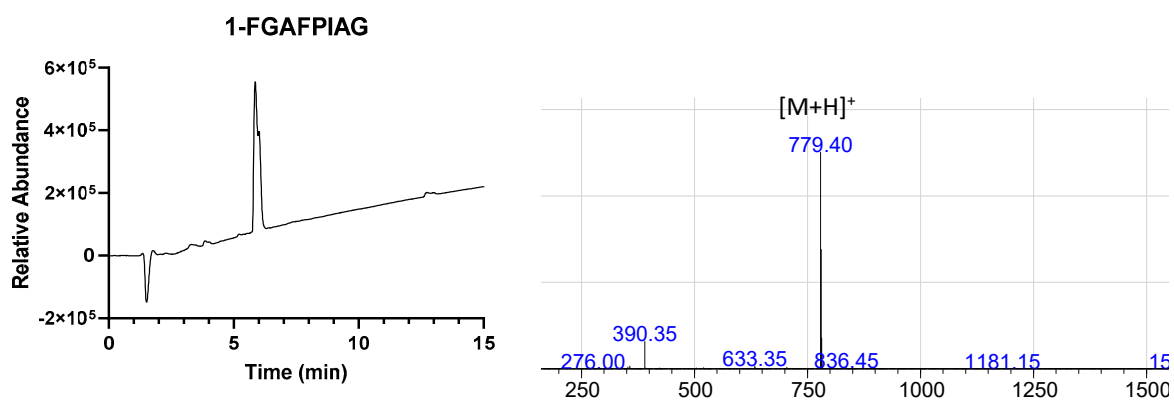

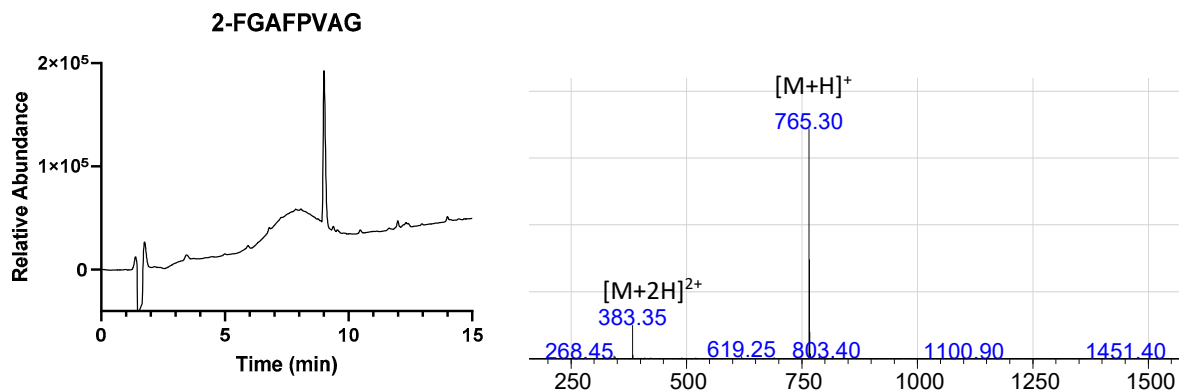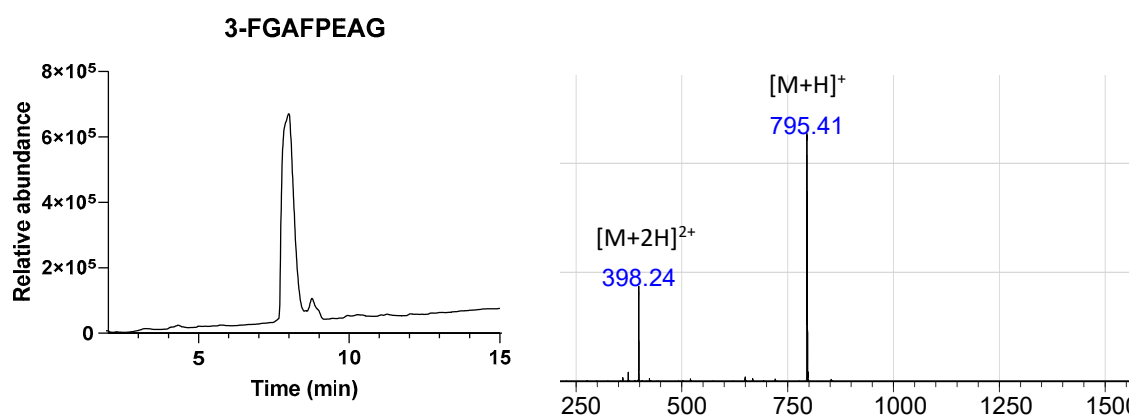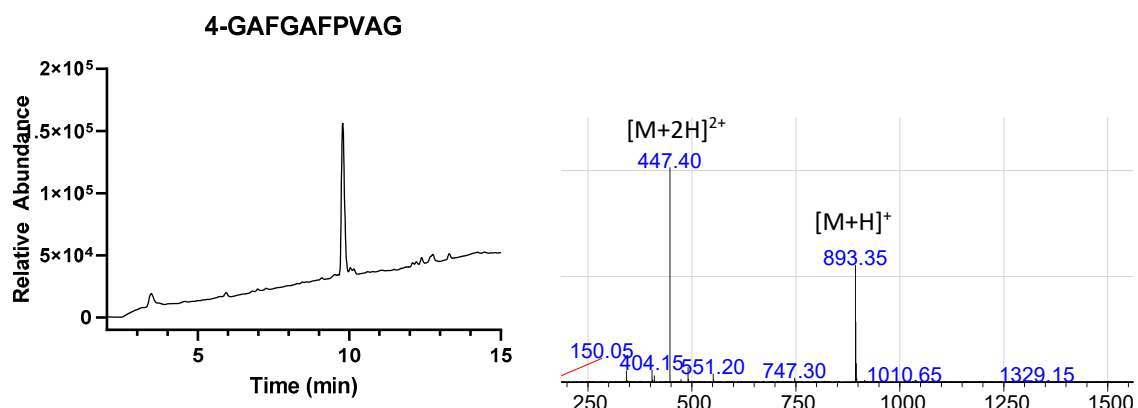

5-EAFGAFPEAG

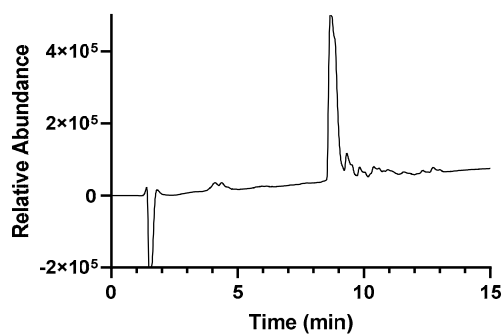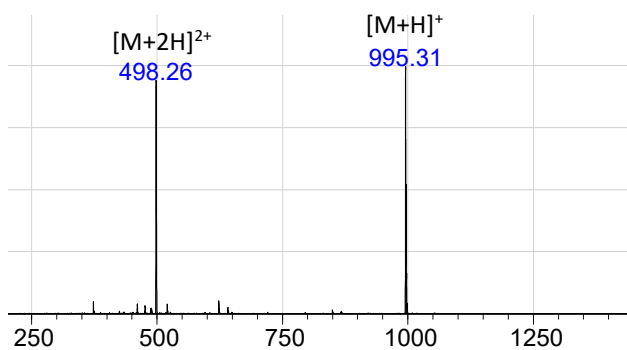

6-GDEAFGAFPEAG

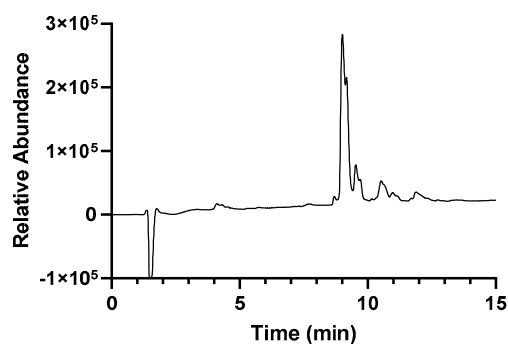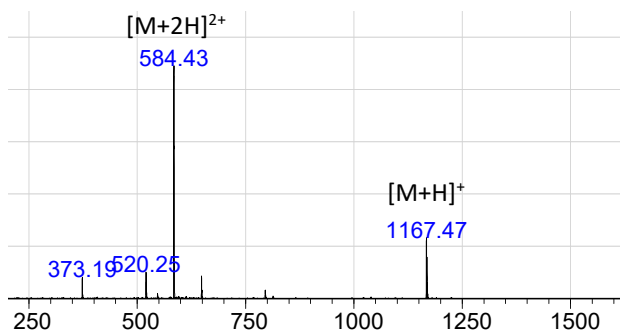

7-FGAFGAFGAFPIAG

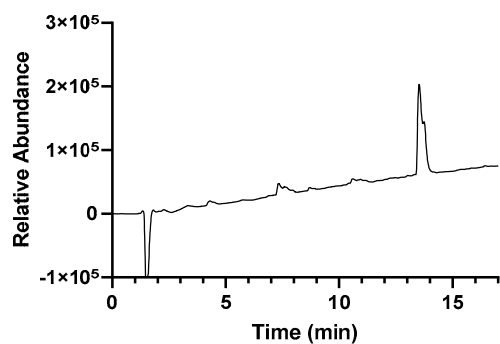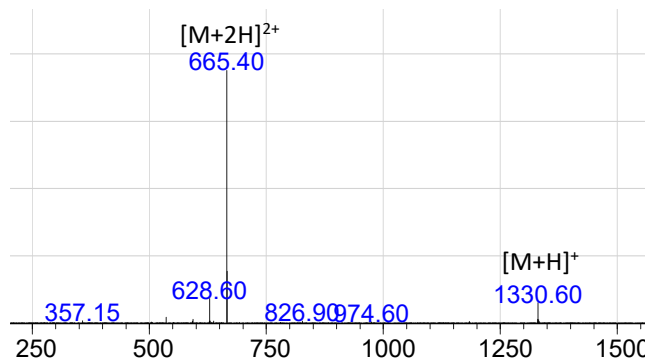

8-DYKG

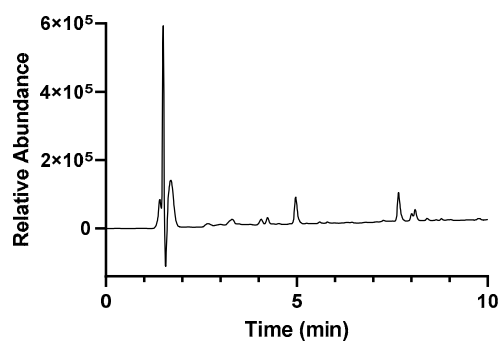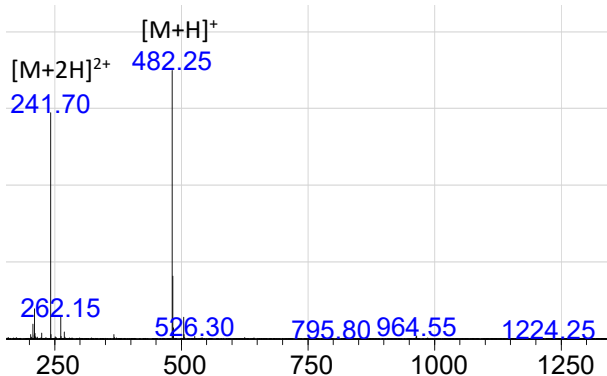

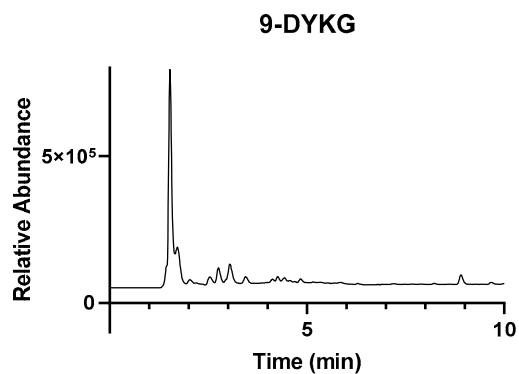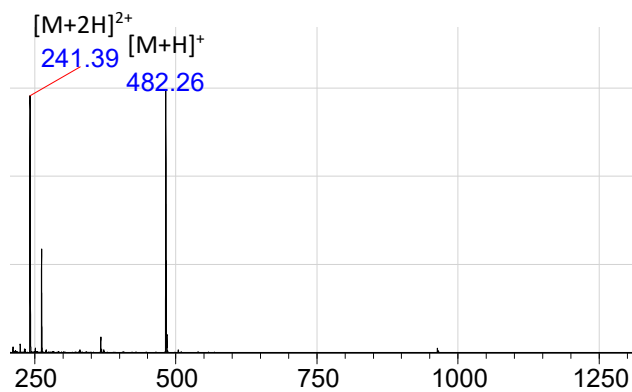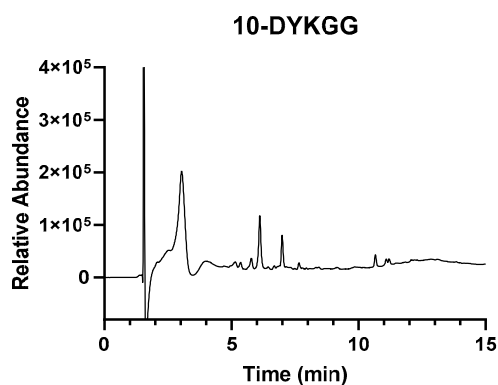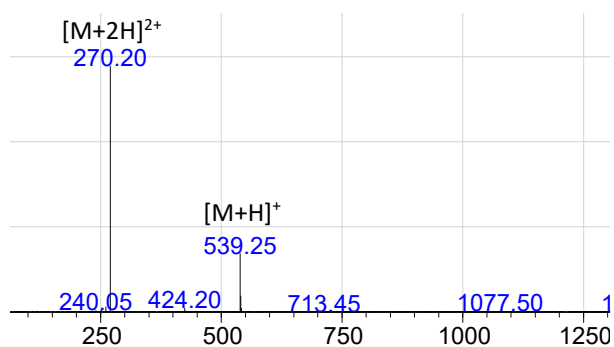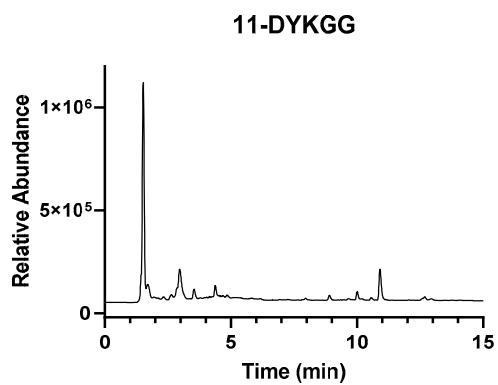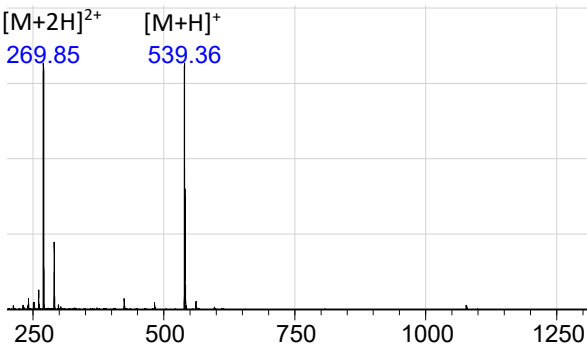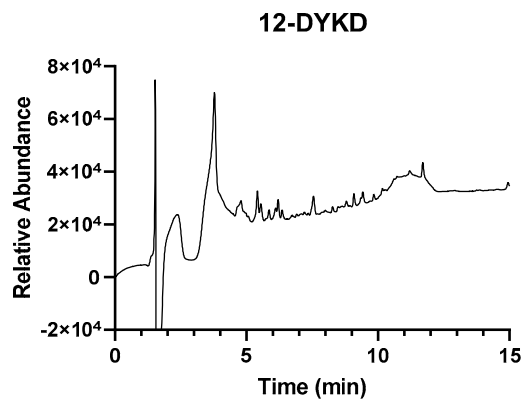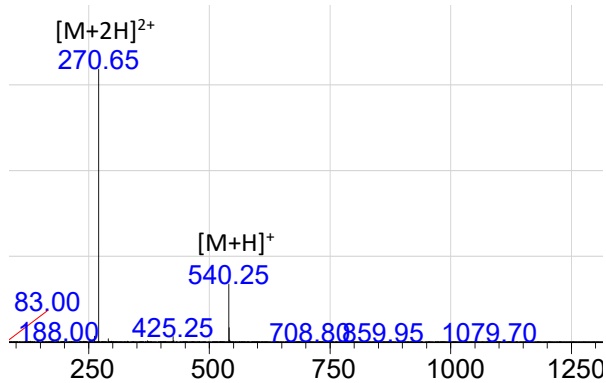

13-DYKDD

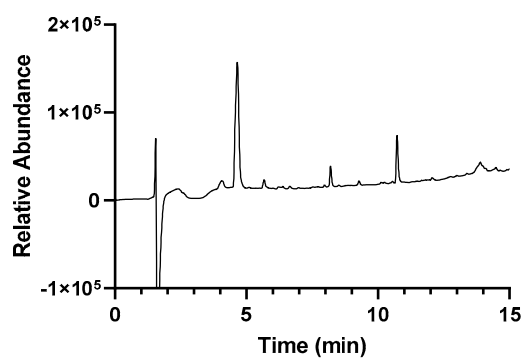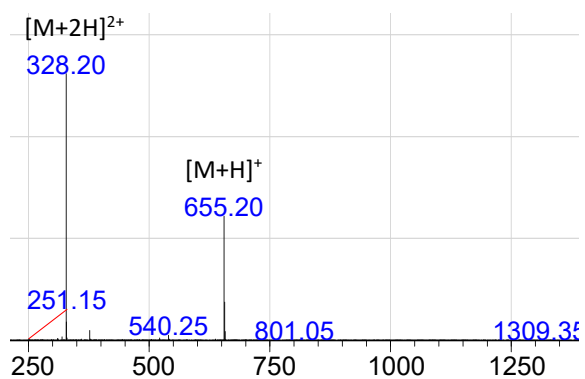

14-DYKK

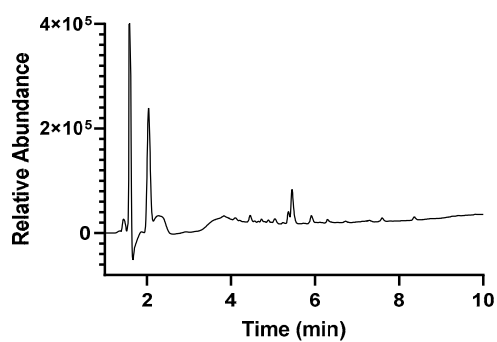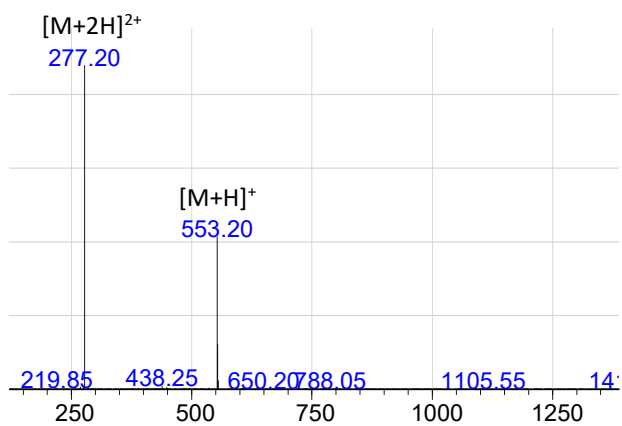



**Figure S2**

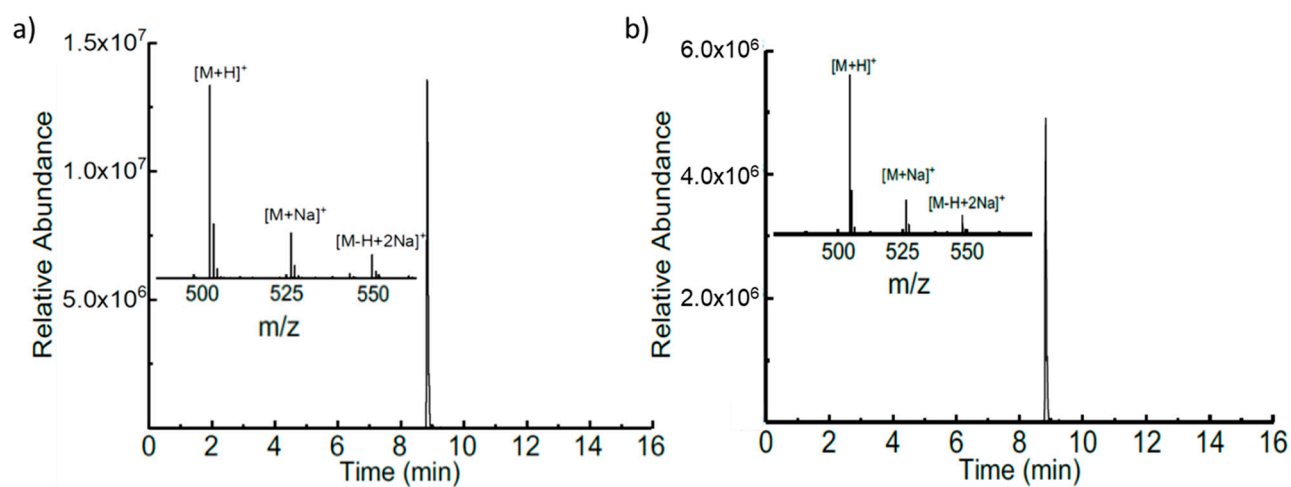

**Figure S2:** LC-MS of crude FPIAG synthesized on a SPR chip using a) standard cycles and b) fast timing cycles.

**Table S3**

| Amino acid | $d_n/d_c$<br>(mL/g) | Mass | Volume | $d_n/d_c$ (mol/mL) | $n_A - n_c$ | $d_A$    | moles/cm <sup>2</sup> | molecules/cm <sup>2</sup> |
|------------|---------------------|------|--------|--------------------|-------------|----------|-----------------------|---------------------------|
| Gly        | 0.175               | 75   | 91     | 13.125             | 0.02864     | 4.497941 | $9.81494^{-11}$       | $6.12452^{+13}$           |
| Ala        | 0.167               | 89   | 108    | 14.863             | 0.02863     | 4.762203 | $9.17324^{-11}$       | $5.7241^{+13}$            |
| Ile        | 0.179               | 131  | 159    | 23.449             | 0.11149     | 5.417502 | $2.57579^{-10}$       | $1.60729^{+14}$           |
| Pro        | 0.165               | 115  | 139    | 18.975             | 0.06024     | 5.180101 | $1.64453^{-10}$       | $1.02619^{+14}$           |
| Phe        | 0.244               | 165  | 200    | 40.26              | 0.24304     | 5.848035 | $3.53032^{-10}$       | $2.20292^{+14}$           |

Variations in surface density calculated by the De Feijter equation:

$$\tau = \frac{d_A(n_A - n_c)}{d_n/d_c}$$

where  $d_A$  is the thickness of the adsorbed layer,  $d_n/d_c$  is the refractive index increment of the amino acids as found in literature,  $n_A$  and  $n_c$  are refractive indexes of adsorbed amino acid layer and the background solution (PBS 0.1X) calculated from experimental data.
